# Supplementary material
Source: PubMed Central journal article supplement (PMC3220587)
Supplement: supp_M111.291575_jbc.M111.291575-1.pdf [file supp_M111.291575_jbc.M111.291575-1.pdf]

**TABLE 1S. List of new primers used for quantitative real time PCR.**

| Gene name      | Primer <sup>a</sup> | Sequence 5' → 3'          |
|----------------|---------------------|---------------------------|
| <i>hPRC</i>    | S                   | CAAGCAGAAACAGAAGAGAGAAG   |
|                | AS                  | GGTGGGATGACAAGACAAGG      |
| <i>hNRF-1</i>  | S                   | AACAAAATTGGGCCACGTTAC     |
|                | AS                  | TCTGGACCAGGCCATTAGCA      |
| <i>hNRF-2α</i> | S                   | AACAAGAACGCCTTGGGATAC     |
|                | AS                  | GTGAGGTCTATATCGGTCATGCT   |
| <i>hNRF-2β</i> | S                   | CCAACCAGTGGAATTGGTCAG     |
|                | AS                  | ACCGGGTAAAAGACTCCTTACTT   |
| <i>hCOX17</i>  | S                   | TCTAATTGAGGCCCAAGG        |
|                | AS                  | TCAGGAATTATTTATTCACACAGCA |
| <i>hIL-1α</i>  | S                   | AGTAGCAACCAACGGGAAGG      |
|                | AS                  | TGGTTGGTCTTCATCTTGGG      |
| <i>hIL-8</i>   | S                   | GGCACAAACTTTCAGAGACAG     |
|                | AS                  | ACACAGAGCTGCAGAAATCAGG    |
| <i>hSPRR2D</i> | S                   | GAGCTAAGAAAAGGAAGTCCTCA   |
|                | AS                  | TTATTCAGGGAGTGAACGATAAAT  |
| <i>hSPRR2F</i> | S                   | CAAAGTGTCCACCCAAGAGCAAGT  |
|                | AS                  | ATGAGAAGATGCAGGTGGAGCTGT  |
| <i>hESM1</i>   | S                   | GCTACCGCACAGTCTCAGGC      |
|                | AS                  | CCCATTAGAAGGCTGACACC      |
| <i>hCCL20</i>  | S                   | TCCTGGCTGCTTTGATGTCA      |
|                | AS                  | CAAAGTTGCTTGCTGCTTCTGA    |
| <i>hCHRNA9</i> | S                   | CAACCAGCAGTGCAACCTGACTTT  |
|                | AS                  | TGAATGTGACATCCGGGTAAGGCT  |

<sup>a</sup> A; sense primer, AS; antisense primer
